# Supplementary material
Source: Springer Nature journal article supplement (https://www.springermedizin.de/resource/supplementary/13014_2014_1155_MOESM2_ESM.pdf/9635000)

% Vol For: PTV final **80.00 %** will receive **30.00 Gy** in 5 Fra ROI contours have been resampled.

**Target Constraints**

| Name      | Display                             | Color | Blocked     | Use Importance                      | Max Dose [Gy] | Max Dose Pen. | DVH Vol | DVH Dose [Gy] | Min Dose [Gy] | Min Dose Pen. |   |
|-----------|-------------------------------------|-------|-------------|-------------------------------------|---------------|---------------|---------|---------------|---------------|---------------|---|
| CTV 1     | <input checked="" type="checkbox"/> |       | 1 Unblocked | <input checked="" type="checkbox"/> | 1             | 31.50         | 1       | 85.00         | 30.00         | 24.00         | 1 |
| PTV 1     | <input checked="" type="checkbox"/> |       | 2 Unblocked | <input checked="" type="checkbox"/> | 1             | 31.50         | 1       | 83.00         | 30.00         | 24.00         | 1 |
| PTV final | <input checked="" type="checkbox"/> |       | 3 Unblocked | <input checked="" type="checkbox"/> | 1             | 31.50         | 1       | 80.00         | 30.00         | 24.00         | 1 |

**Regions at Risk Constraints**

| Name       | Display                             | Color | Blocked     | Use Importance                      | Max Dose [Gy] | Max Dose Pen. | DVH Vol | DVH Dose [Gy] | DVH Pt. Pen. |
|------------|-------------------------------------|-------|-------------|-------------------------------------|---------------|---------------|---------|---------------|--------------|
| brain stem | <input checked="" type="checkbox"/> |       | 1 Unblocked | <input checked="" type="checkbox"/> | 1             | 25.00         | 1       | 1.00          | 22.00        |
| chiasm     | <input checked="" type="checkbox"/> |       | 2 Unblocked | <input checked="" type="checkbox"/> | 1             | 24.00         | 1       | 1.00          | 21.00        |
| pituitary  | <input checked="" type="checkbox"/> |       | 3 Unblocked | <input checked="" type="checkbox"/> | 1             | 20.00         | 1       | 1.00          | 18.00        |
| optic N    | <input checked="" type="checkbox"/> |       | 4 Unblocked | <input checked="" type="checkbox"/> | 1             | 18.00         | 1       | 1.00          | 17.00        |
| eye        | <input checked="" type="checkbox"/> |       | 5 Unblocked | <input checked="" type="checkbox"/> | 1             | 15.00         | 1       | 1.00          | 14.00        |

Presets ▾  
 Lines  
 Gy  %  
 32.1 Gy  
 30.0 Gy  
 28.5 Gy  
 27.0 Gy  
 24.0 Gy  
 21.0 Gy  
 15.0 Gy  
 8.0 Gy  
 Edit

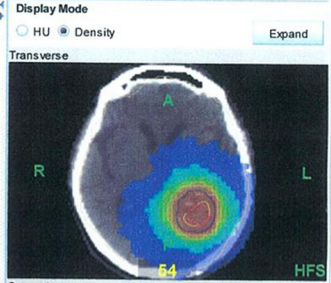

**Optimize**  
 Dose Calc Grid Normal  
 Field Width 2.49 cm - Ja...  
 Modulation Factor 2.000  
 Pitch 0.430  
 Batch Beamlets  
 Mode Beamlet  
 Initiate Full Dose After 20 iterations.  
 Resume  
 Get Full Dose  
 Cancel

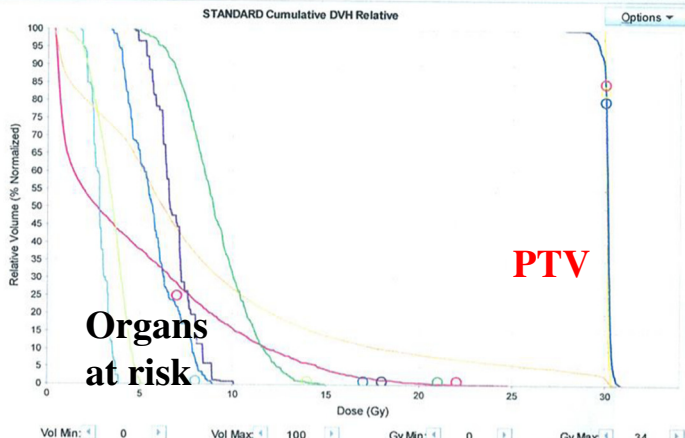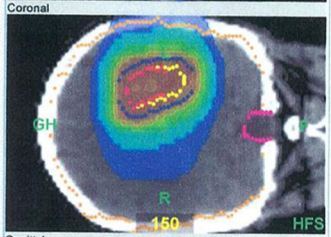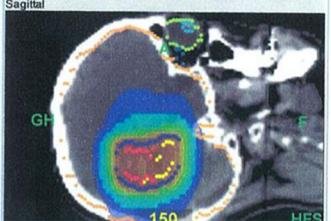

Supplement: MOESM2 [file 9635000]
